# Supplementary material
Source: publisher figshare collection journal article supplement (https://sage.figshare.com/ndownloader/files/24280124)
Supplement: Supplementary file 1 [file 24280124]

## Sheet: Sheet1
Supplementary Table 1. General features between Group 1+group 2 compared Group 3
Varibles	All patients (n=207)	Group 1+Group 2 (n=151)	Group 3 (n=56)	P
Ages
≥60	49/207(23.7%)	37/151(24.5%)	12/56(21.4%)	0.644
＜60	158/207(86.3%)	114/151(75.5%)	44/56(78.6%)
Sex
Male98	98/207(47.3%)	73/151(48.3%)	25/56(44.6%)	0.636
Female	109/207(52.7%)	78/151(51.7%)	31/56(55.4%)
Body mass index
<18.5	7/132(5.3%)	5/95(5.3%)	2/37(5.4%)	0.054
18.5-24	68/132(51.5%)	55/95(57.9%)	13/37(35.1%)
>24	57/132(43.2%)	35/95(36.8%)	22/37(59.5%)
Smoking
Yes	9/207(4.3%)	8/151(5.3%)	1/56(1.8%)	0.473
No	198/207(95.7%)	143/151(94.7%)	55/56(88.2%)
Hypertension
Yes	29/207(14.0%)	23/151(15.2%)	6/56(10.7%)	0.405
No	178/207(86.0%)	128/151(84.8%)	50/56(89.3%)
Other comorbidity
Yes	47/207(22.7%)	35/151(23.2%)	12/56(21.4%)	0.789
No	160/207(77.3%)	116/151(76.8%)	44/56(78.6%)
Symptoms
Fever	141/207(68.1%)	99/151(65.6%)	42/56(75.0%)	0.196
No	66/207(31.9%)	52/151(34.4%)	14/56(25.0%)
Coughing
Yes	158/207(76.3%)	126/151(83.4%)	47/56(83.9%)	0.933
No	49/207(23.7%)	25/151(16.6%)	9/56(16.1%)
Expectoration
Yes	81/207(39.1%)	54/151(35.8%)	27/56(48.2%)	0.103
No	126/207(60.9%)	97/151(64.2%)	29/56(51.8%)
dyspnea
Yes	47/207(22.7%)	34/151(22.5%)	13/56(23.2%)	0.915
No	160/207(77.3%)	117/151(77.5%)	43/56(76.8%)
Diarrhea
Yes	30/207(14.5%)	23/151(15.2%)	7/56(12.5%)	0.62
No	177/207(85.5%)	128/151(84.8%)	49/56(87.5%)
Nausea/Vomit
Yes	18/207(8.7%)	14/151(9.3%)	4/56(7.1%)	0.629
No	189/207(91.3%)	137/151(90.7%)	52/56(92.9%)
Poor appetite
Yes	24/207(11.6%)	19/151(12.6%)	5/56(8.9%)	0.466
No	183/207(88.4%)	132/151(87.4%)	51/56(91.1%)
Fatigue
Yes	74/207(35.7%)	55/151(36.4%)	19/56(33.9%)	0.739
No	133/207(64.3%)	96/151(63.6%)	37/56(66.1%)
Headache
Yes	20/207(9.7%)	15/151(9.9%)	7/56(12.5%)	0.595
No	187/207(90.3%)	136/151(90.1%)	49/56(87.5%)
Complications
Yes	31/207(15.0%)	18/151(11.9%)	13/56(23.2%)	0.043
No	176/207(85.0%)	133/151(88.1%)	43/56(76.8%)
Severe/critical type	39/207(18.8%)	27/151(17.9%)	12/56(21.4%)	0.562
Mild/moderate type	168/207(81.2%)	124/151(82.1%)	44/56(78.6%)
ICU	21/207(10.1%)	11/151(7.3%)	10/56(7.9%)	0.025
non-ICU	186/207(89.9%)	140/151(92.7%)	46/56(82.1%)
CT findings
Locations of lesions
Single lung	24/168(14.3%)	16/120(13.3%)	8/48(16.7%)	0.577
Bilateral lung	144/168(85.7%)	104/120(86.7%)	40/48(83.3%)
Features of lesions
Ground glass opacities	151/162(93.2%)	109/119(91.6%)	42/43(97.7%)	0.315
Consolidative/ mixed opacities	11/162(6.8%)	10/119(8.4%)	1/43(2.3%)
Laboratory findings
White cell count
＜4*109/L	74/207(35.7%)	48/151(31.8%)	26/56(46.4%)	0.149
4-10*109/L	127/207(61.4%)	98/151(64.9%)	29/56(51.8%)
＞10*109/L6	6/207(2.9%)	5/151(3.3%)	1/56(1.8%)
Neutrophil
＜2*109/L	42/207(20.3%)	31/151(20.5%)	11/56(19.6%)	0.987
2-7*109/L	158/207(76.3%)	115/151(76.2%)	43/56(76.8%)
＞7*109/L	7/207(3.4%)	5/151(3.3%)	2/56(3.6%)
Lymphocyte
＜0.8*109/L55	55/207(26.6%)	33/151(21.9%)	22/56(39.3%)	0.012
≥0.8*109/L	152/207(73.4%)	118/151(78.1%)	34/56(60.7%)
Hemoglobin
＜110g/L	18/207(8.7%)	13/151(8.6%)	5/56(8.9%)	1
≥110g/L	189/207(91.3%)	138/151(91.4%)	51/56(91.9%)
Blood platelet
＜100*109/L	13/207(5.8%)	9/151(6.0%)	4/56(7.1%)	1
≥100*109/L	194/207(94.2%)	142/151(94.0%)	52/56(92.9%)
Creatine kinase
＞170U/L	23/205(11.2%)	13/151(8.6%)	10/56(17.9%)	0.056
≤170U/	182/205(88.8%)	137/151(91.4%)	45/56(82.1%)
Creatine kinase-MB
＞23U/L	17/205(8.3%)	9/151(6.0%)	8/56(14.3%)	0.082
≤23U/L	188/205(91.7%)	142/151(94.0%)	46/56(85.7%)
D-dmier>0.5mg/L
＞0.5mg/L	63/207(30.4%)	43/151(28.5%)	20/56(35.7%)	0.315
≤0.5mg/L	144/207(69.6%)	108/151(71.5%)	36/56(64.3%)
Albumin
＜35g/L	44/178(24.7%)	29/151(19.2%)	15/56(26.8%)	0.183
≥35g/L	134/178(75.3%)	102/151(80.8%)	32/56(73.2%)
ALT
＞40U/L	32/207(15.5%)	22/151(14.6%)	10/56(17.9%)	0.561
≤40U/L	175/207(84.5%)	129/151(85.4%)	46/56(82.1%)
AST
＞40U/L	26/207(12.6%)	20/151(13.2%)	6/56(10.7%)	0.625
≤40U/L	181/207(87.4%)	131/151(86.8%)	50/56(89.3%)
Total bilirubin
＞17.1umol/L	44/207(21.3%)	33/151(21.9%)	11/56(19.6%)	0.73
≤17.1umol/L	163/207(78.7%)	118/151(78.1%)	45/56(80.4%)
Creatinine
＞133umol/L	4/207(1.9%)	3/151(2.0%)	1/56(1.7%)	1
≤133umol/L	203/207(98.1%)	148/151(98.0%)	55/56(98.3%)
LDH
＞250	29/207(14.0%)	17/151(11.3%)	12/56(21.4%)	0.061
≤250U/L	178/207(86.0%)	134/151(88.7%)	44/56(78.6%)
CRP
＞10mg/L	115/198(58.1%)	83/142(58.5%)	32/56(57.1%)	0.867
≤10mg/L	83/198(41.9%)	59/142(41.5%)	24/56(42.9%)
Procalcitonin
＞0.5ug/L	5/205(2.4%)	4/149(2.7%)	1/56(1.7%)	1
≤0.5ug/L	200/205(97.6%)	145/149(97.3%)	55/56(98.3%)
Therapy
Antibiotic
Yes	98/202(48.5%)	67/151(44.4%)	31/56(57.1%)	0.172
104	104/202(51.5%)	80/151(55.6%)	24/56(42.9%)
Corticosteroid
Yes	61/204(29.9%)	36/151(23.8%)	25/56(44.6%)	0.005
No	143/204(70.1%)	112/151(76.2%)	31/56(55.4%)
Oxygen therapy				0.958
Yes	165/174(%)	121/151(96.0%)	44/56(94.6%)
No	9/174(5.2%)	6/151(4.0%)	3/56(5.4%)
Group 1: One drug.
Group 2: Two drugs.
Group 3: Three/four drugs.
ALT: Alanine aminotransferase.
AST: Aspartate aminotransferase.
LDH: Lactate dehydrogenase.
CRP: C-responsive protein.
Supplementary Table 2. Subgroups analysis of viral clearance time
Group 1	Number of patients	Viral clearance days median(IQR)	P
Arbidol	19	8(6-11)	0.198
LPV/r	26	10(7-11.25)
Novaferon	11	9(7-10)
Group 2
Arbidol+ interferon-α	6	7.5(4-19.3)	0.023#
Arbidol+ LPV/r	9	15(9.5-20.5)
Arbidol+novaferon	9	10(8.5-12)
Interferon-α+LPV/r	50	9(7-10.5)
LPV/r+novaferon	16	8(6.3-9.8)
Group 3
Arbidol+ interferon-α+LPV/r	24	14.5(10-18.8)	0.077*
Arbidol+LPV/r+novaferon	12	9.5(7.3-13)
Interferon-α+LPV/r +novaferon	7	10(8-18)
Arbidol+ interferon-α +LPV/r+novaferon	9	14(11.5-19)
#Arbidol+ LPV/r VS interferon-α+LPV/r or LPV/r+novaferon: P<0.05.
*Arbidol+ interferon-α+LPV/r VS arbidol+LPV/r+novaferon, or arbidol+LPV/r+novaferon VS arbidol+ interferon-α+LPV/r+novaferon : P<0.05.
LPV/r：lopinavir/ritonavir.
IQR: interquartile range.
Supplementary Table 3. Analysis of viral clearance in only moderate group
Variables	All patients (n=159)	One/two drugs (n=119)	Three/four drugs (n=40)	P
Viral clearance rate at d14	134/159(84.3%)	106(89.1%)	28(70%)	0.004
Viral clearance days	159/159(100.0%)	9(7-11)	12(9-17)	<0.001
Complications
Yes	10/159(6.3%)	6/119(5.0%)	4/40(10.0%)	0.459
No	149/159(93.7%)	113/119(95.0%)	36/40(90.0%)
Lymphocyte
＜0.8*109/L	30/159(18.9%)	18/119(15.1%)	12/40(30.0%)	0.038
≥0.8*109/L	129/159(81.1%)	101/119(84.9%)	28/40(70.0%)
Antibiotic
Yes	61/154(38.4%)	41/115(35.7%)	20/39(51.3%)	0.085
No	93/154(61.6%)	74/115(64.3%)	19/39(48.7%)
Corticosteroid
Yes	29/166(17.5%)	15/117(12.8%)	14/39(35.9%)	0.001
No	137/166(82.5%)	112/117(87.2%)	25/39(64.1%)
ALT
＞40U/L	18/159(11.3%)	13/119(10.9%)	5/40(12.5%)	1
≤40U/L	141/159(88.7%)	106/119(89.1%)	35/40(87.5%)
LDH
＞250	12/159(7.5%)	9/119(7.6%)	3/40(7.5%)	1
≤250U/L	147/159(92.5%)	110/119(92.4%)	37/40(82.5%)
ALT: Alanine aminotransferase
LDH: Lactate dehydrogenase
Supplementary Table 4. Subgroup analysis of viral clearance t- ime in 3/4 drugs of moderate group
drugs	Viral clearance days median(IQR)	P
Arbidol+ interferon-α+LPV/r	12(9-17)	0.199
Arbidol+LPV/r+novaferon	9.5(7-12)
Interferon-α+LPV/r +novaferon	9.5(7.8-19)
Arbidol+ interferon-α +LPV/r+novaferon	14(12.2-18)
Supplementary Table 5. Logistics analysis of factors associated viral clearance in moder-
ate group
Variables	Univariate analysis OR (95%CI)	P	Multivariate analysis OR (95%CI)	P
Three/four drugs	3.5(1.44-8.50)	0.006	3.14(1.27-7.77)	0.013
Lymphocytopenia	-	0.663	-	0.829
Corticosteroid	2.64(1.00-6.96)	0.049	-	0.176
Supplementary Table 6. Relationship of complications，bilirubin and severity of disease
in total patients
Variables	All patients (n=207)	ICU(n=21)	non-ICU(n=186)	P
complications
Yes	31/207(15.0%)	17/21(89.0%)	14/186(7.5%)	<0.001
No	176/207(85.0%)	4/21(19.0%)	172/186(92.5%)
Total bilirubin
Yes	44/207(21.3%)	5/21(23.8%)	39/186(21.0%)	0.984
No	163/207(78.7%)	16/21(76.2%)	147/186(79.0%)
		Severe/critical (n=39)	Mild/moderate (n=168)
complications
Yes	31/207(15.0%)	20	11	<0.001
No	176/207(85.0%)	19	157
Total bilirubin
Yes	44/207(21.3%)	9	35	0.758
No	163/207(78.7%)	30	133
